# Supplementary material for: Novel forms of Paired-like homeodomain transcription factor 2 (PITX2): Generation by alternative translation initiation and mRNA splicing
Source: PubMed Central journal article supplement (PMC2330153; doi:10.1186/1471-2199-9-31), 2008-03-28

**A**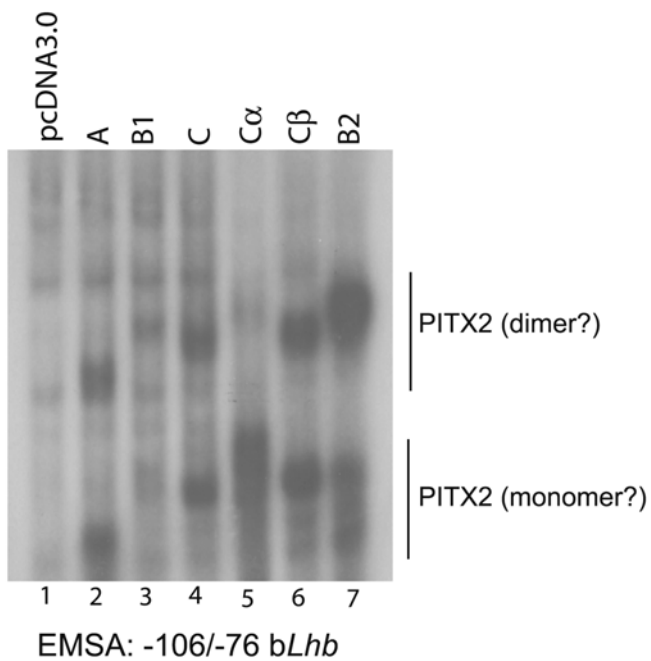**B**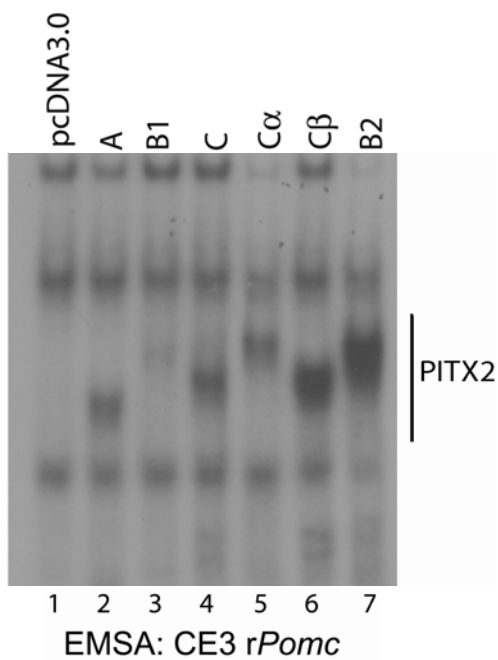

Supplement: 1471-2199-9-31-S1.pdf [file 1471-2199-9-31-S1.pdf]
